# Supplementary material
Source: PubMed Central journal article supplement (PMC8626537)
Supplement: NIHMS1710309-supplement-supplements.pdf [file NIHMS1710309-supplement-supplements.pdf]

## Supplementary Material

In addition to the authors, other members of the Eunice Kennedy Shriver National Institute of Child Health and Human Development Maternal-Fetal Medicine Units (MFMU) Network are as follows:

Columbia University, New York, NY: S. Bousleiman, R. Wapner, M. DiVito, M. Talucci, L. Plante (Drexel University), C. Tocci (Drexel University), M. Hoffman (Christiana Care Health Systems), S. Lynch (Christiana Care Health Systems), A. Ranzini (St. Peter's University Hospital), M. Lake (St. Peter's University Hospital), J. Smulian (Lehigh Valley Health Network), D. Skupski (New York Hospital Queens)

The University of Texas Health Science Center at Houston-Children's Memorial Hermann Hospital, Houston, TX: F. Ortiz, B. Sibai, M. Hutchinson, P. Givens, and L. Garcia (LBJ General Hospital)

University of Alabama at Birmingham, Birmingham, AL: S. Harris, J. Biggio, A. Todd, L. Merin, G. Adams, M. Tew, J. Grant

University of Texas Medical Branch, Galveston, TX: A. Salazar, L. McCoy, B. Aguilon, M. Wilson, J. Sikes, G. Hankins, G. Olson, H. Harirah

Brown University, Providence, RI: D. Allard, L. Beati, B. Wallin, J. Rousseau, B. Hughes

The Ohio State University, Columbus, OH: F. Johnson, M. Prasad, D. McKenna, R. Ozug, T. Dible, K. Snow, K. Fennig, S. Webster, M. Donohue

University of Utah Health Sciences Center, Salt Lake City, UT: K. Hill, A. Sowles, S. Timothy, P. Reed (deceased; Intermountain Healthcare), M. Varner

University of North Carolina at Chapel Hill, Chapel Hill, NC: K. Clark, S. Timlin, R. Bass, K. Dorman, S. Brody

(WakeMed Health & Hospitals), J. Warren (Mission Health System)

MetroHealth Medical Center-Case Western Reserve University, Cleveland, OH: M. Duchon, W. Dalton, C. Milluzzi, L. Wolfe, K. Kushner, B. Mercer

Northwestern University, Chicago, IL: G. Mallett, W. Grobman, L. Stein, M. Dinsmoor (NorthShore University HealthSystem), K. Paychek (NorthShore University HealthSystem)

University of Colorado School of Medicine, Anschutz Medical Campus, Aurora, CO: K. Hale, M. Hoffman, J.C. Carey, H. Galan, K. Heyborne, T. Metz, A. Rosenberg Duke University, Durham, NC: T. Bishop, A. Murtha, R. Heine, C. Grotegut, L. Brancazio

Stanford University, Stanford, CA: K. Kushniruk, Y. El-Sayed, D. Lyell, A. Sit, C. Willson, A. Monk, E. Kogut, R. Knapp

University of Texas Southwestern Medical Center, Dallas, TX: L. Moseley, J. Price, M. Santillan, J. Gerald A. Sias, K. Gonzales

University of Pittsburgh, Pittsburgh, PA: H. Simhan, H. Birkland, P. Cotroneo

Oregon Health & Science University, Portland, OR – L. Pereira, C. McEvoy, M. Rincon, J. Snyder

Wayne State University, Detroit, MI: N. Hauff

The George Washington University Biostatistics Center, Washington, D.C.: E. Thom, V. Momirova, G. Heinrich, T. Spangler

National Heart, Lung, and Blood Institute, Bethesda, MD: C. Blaisdell

Eunice Kennedy Shriver National Institute of Child Health and Human Development, Bethesda, MD: C. Spong, S. Tolivava

| <b>Supplementary Table S1</b> Neonatal characteristics associated with hypoglycemia by exposure group |                 |                 |                 |                 |
|-------------------------------------------------------------------------------------------------------|-----------------|-----------------|-----------------|-----------------|
| Neonatal baseline characteristics                                                                     | BMZ             |                 | PBL             |                 |
|                                                                                                       | No hypoglycemia | Hypoglycemia    | No hypoglycemia | Hypoglycemia    |
| <i>n</i>                                                                                              | 934             | 387             | 1,065           | 223             |
| Sex                                                                                                   |                 |                 |                 |                 |
| Male                                                                                                  | 481 (51.5)      | 201 (51.9)      | 577 (54.2)      | 128 (57.4)      |
| Female                                                                                                | 453 (48.5)      | 186 (48.1)      | 488 (45.8)      | 95 (42.6)       |
| Gestational age at randomization                                                                      | 35.1 ± 0.8      | 35.1 ± 0.8      | 35.0 ± 0.8      | 35.1 ± 0.8      |
| Weight at birth, g                                                                                    | 2,649.7 (486.3) | 2,610.0 (468.8) | 2,635.9 (464.7) | 2,714.9 (567.0) |
| Gestational age at birth, wk                                                                          |                 |                 |                 |                 |
| < 34                                                                                                  | 117 (12.5)      | 60 (15.5)       | 169 (15.9)      | 23 (10.3)       |
| 35                                                                                                    | 234 (25.1)      | 129 (33.3)      | 285 (26.8)      | 76 (34.1)       |
| > 35                                                                                                  | 583 (62.4)      | 198 (51.2)      | 76 (34.1)       | 124 (55.6)      |
| Days from NICU admission to discharge                                                                 | 8.9 ± 7.7       | 7.0 ± 6.3       | 9.3 ± 8.6       | 9.5 ± 11.3      |

Abbreviations: BMZ, betamethasone; NICU, neonatal intensive care unit; PBL, peripheral blood lymphocyte.
